# Supplementary figures and images for: New Horizons in Probiotics: Unraveling the Potential of Edible Microbial Polysaccharides through In Vitro Digestion Models
Source: MDPI journal article supplement (doi:10.3390/foods13050713), 2024-02-26

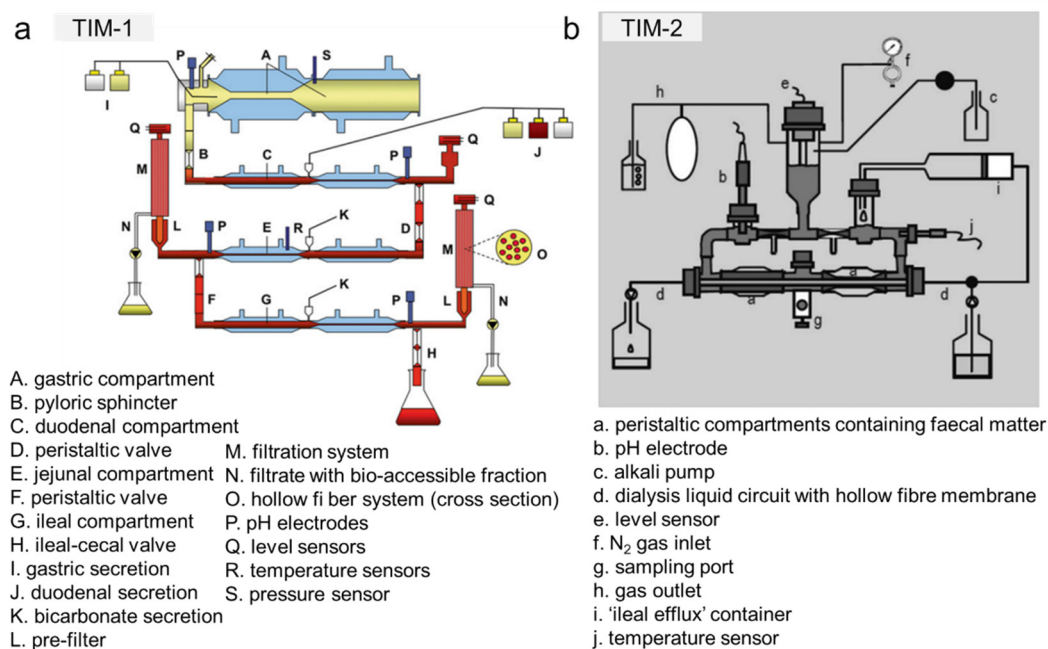

**Supplementary Figure.S2: (a) Schematic representation of TIM-1 [30] ;(b) Schematic representation of TIM-2 [29].**

Supplement: s1 [file s1]
